# Supplementary material
Source: publisher site journal article supplement (https://www.dovepress.com/article/520647)
Supplement: Supplementary file 1 [file 520647%20Supplemental%20Material.docx]

**Supplemental Material**

Table S1: Sleep parameters during baseline and recovery

|  | | *NT1* | | *IH* | | *HC* | |
| --- | --- | --- | --- | --- | --- | --- | --- |
|  | | *Baseline* | *Recovery* | *Baseline* | *Recovery* | *Baseline* | *Recovery* |
| *TIB (min)* | | *421.0±2.1* | *420.5±1.7* | *420.4±1.1* | *420.3±0.4* | *414.6.0±11.7* | *420.5±0.6** |
| *TST (min)* | | *393.2±14.5* | *377.6±20.4* | *385.2±39.7* | *380.4±23.8** | *391.5±26.0* | *377.3.8±26.7** |
| *Sleff (%)* | | *93.4±3.2* | *89.8±5.0* | *91.6±9.4* | *90.5±5.7** | *94.4±4.6* | *89.7±6.3** |
| *WASO (%)* | | *26.5±13.5* | *40.1±20.9* | *24.5±33.4* | *17.7±13.1* | *16.5±16.2* | *19.1±19.9* |
| *NREM (min)* | | *307.1±23.1* | *289.6±31.2** | *314.6±31.8* | *292.8±23.5* | *313.1±21.7* | *291.8±20.1** |
|  | *N1* | *57.2±27.5* | *71.7±28.3* | *33.3±14.3* | *32.6±9.9* | *40.9±25.0* | *31.0±12.0* |
|  | *N2* | *165.5±30.0* | *161.5±26.2* | *180.1±45.7* | *174.2±41.3* | *186.7±21.6* | *184.8±20.8* |
|  | *N3* | *84.4±20.5* | *56.4±18.5* | *101.3±47.4* | *86.0±37.1*** | *85.5±23.8* | *76.0±25.4* |
| *REM (min)* | | *86.1±30.2* | *88.1±33.5** | *70.6±18.0* | *87.6±20.5* | *78.4±31.6* | *85.4±21.1* |
| *SL1, min* | | *2.5±4.1* | *3.7±4.1** | *10.7±10.1* | *22.3±15.9** | *6.5±4.3* | *24.1±15.2*** |
| *RL, min* | | *17.3±33.1* | *17.8±28.3* | *110.7±50.7* | *82.8±16.6* | *91.9±41.0* | *78.2±20.8* |
| *# SOREM* | | *10* | *9* | *0* | *0* | *0* | *1* |
| *Sleep stages derived from visual scoring for patients with narcolepsy (NT1), idiopathic hypersomnia (IH) and for healthy controls (HC), analyzing differences between Baseline & Recovery sleep of each group*  *N = 12 for all groups (mean ± SD). TIB refers to time in bed; TST, total sleep time; SLeff, sleep efficiency; WASO, wake after sleep onset; NREM, non-rapid eye movement (NREM) sleep, N1-N3, NREM stage 1 to 3; R, sleep stage REM; SL1, sleep latency to stage 1 or R; SL2, sleep latency to 2 or R. RL; latency to REM sleep; SOREM, sleep onset REM period (REM sleep within the first 15 minutes after sleep onset).*  *Statistics was conducted using a mixed linear model in R; * P < 0.05, ** P < 0.001* | | | | | | | |

*Table S2: Sleep parameters during the nap protocol*

|  | *NT1* | *IH* | *HC* | *Statistics* |
| --- | --- | --- | --- | --- |
| *TST [min]* | *75.9±4.5* | *62.3±18.9* | *56.4±25.5* | *b, c* |
| *TST all naps [min]* | *761.1±14.3* | *622.9±92.1* | *558.9±100.0* |  |
| *Sleff %* | *94.3±5.3* | *77.5±23.5* | *70.1±31.8* | *b, c* |
| *WASO (%)* | *2.7±3.4* | *7.7±12.6* | *4.9±10.2* | *n.s.* |
| *Sleep Stages (min)* | | | | |
| *N1* | *11.7±5.5* | *13.3±8.0* | *10.0±7.8* | *n.s.* |
| *N2* | *23.0±10.4* | *24.1±11.0* | *19.0±11.1* | *n.s.* |
| *N3* | *19.5±11.9* | *13.4±12.8* | *13.5±12.1* | *b, c* |
| *NREM* | *54.3±8.9* | *50.7±16.4* | *42.5±20.2* | *b* |
| *REM* | *21.6±9.0* | *11.6±12.1* | *13.9±13.0* | *b, c* |
| *# SOREM (total)* | *109* | *20* | *44* | *a, b, c* |
| *Sleep during 10 naps in healthy controls (HC), patients with narcolepsy (NT1) and idiopathic hypersomnia (IH), accumulated over all naps expressed as percentage of TST in baseline night*  *Accumulated sleep over all 10 naps expressed as percentage of total sleep time (TST) in baseline night. NREM, non-rapid eye movement (NREM) sleep, N1-N3, NREM stage 1 to 3; R, sleep stage REM; SLeff, averaged sleep efficiency over all 10 naps.*  *Statistics: n.s: non significant, a: comparison HC & IH, b: comparison HC & NT1, c: comparison NT1 & IH, significant p-value < 0.05* | | | | |

Figure S1: section of a nap-protocol study log

Example of a nap-protocol study log including wake 3, wake 4 and nap 4.

KSS: Karolinska Sleepiness Scale, PVT: Psychomotor Vigilance Task, SART: Sustained Attention to Response Task, VAS: Visual Analog Scale

The results of the analyses of SART and core temperature fall outside the main scope of this paper and will be presented in detail in a subsequent study.
